# Supplementary material for: ECT2 promotes lung adenocarcinoma progression through extracellular matrix dynamics and focal adhesion signaling
Source: PubMed Central journal article supplement — Cancer Sci. 2020 Dec 28;112(2):703–14. doi: 10.1111/cas.14743 (PMC7893990; doi:10.1111/cas.14743), 2020-12-28
Supplement: CAS-112-703-s002.pdf [file CAS-112-703-s002.pdf]

## **Supplementary Figures**

**ECT2 promotes lung adenocarcinoma progression through extracellular  
matrix dynamics and focal adhesion signaling**

**Figure S1**

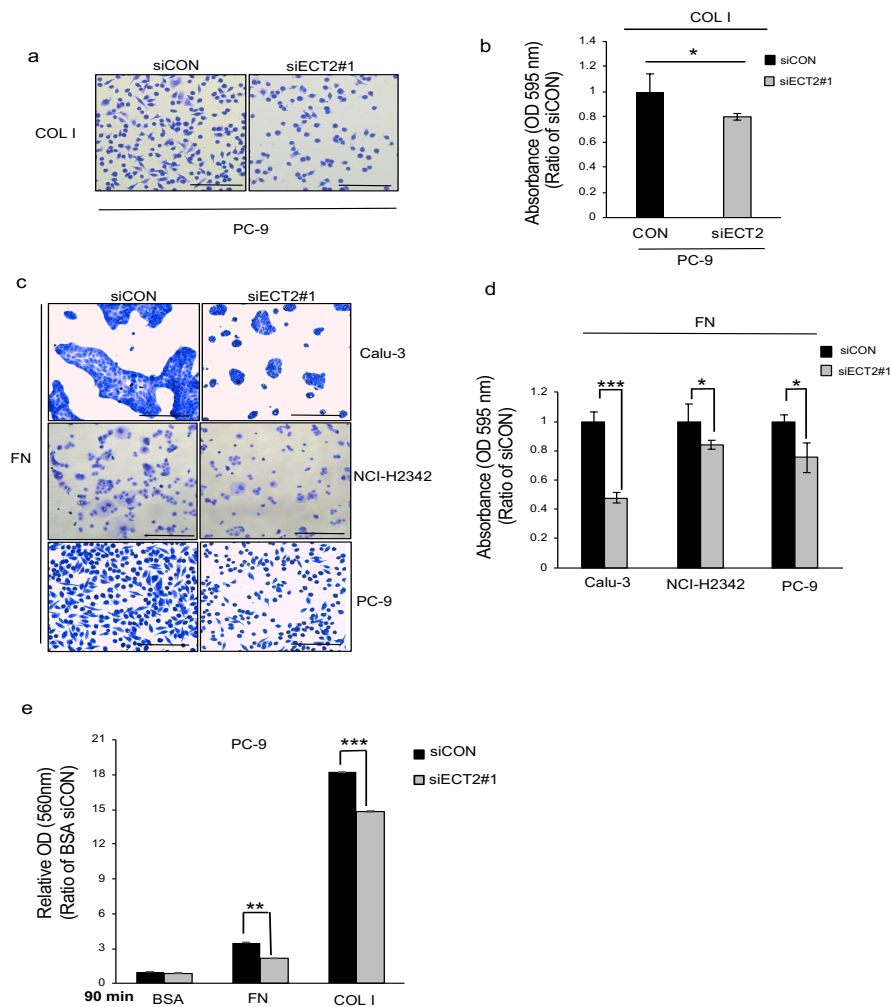

**Figure S1. ECT2 suppression reduces the viability and adhesion of LAC cell lines.**

(a, b) PC-9 cells were transfected with siECT2#1 or siCON and seeded on COL I-coated plates. Non-attached cells were removed, and the viability of adherent cells was measured and quantified. Error bars represent mean $\pm$ SD from more than four independent experiments. Scale bar 100  $\mu$ m. (c, d) Calu-3, NCI-H2342, and PC-9 cells were transfected with siECT2#1 or siCON and seeded onto FN. Error bars represent mean $\pm$ SD from more than four independent experiments. Scale bar 100  $\mu$ m. (e) PC-9 cells were transfected with siECT2#1 or siCON for 24 h. After siRNA treatment, the cells were plated on FN-, COL I-, or 1% BSA-coated plates for 90 minutes. Error bars represent mean $\pm$ SD, n = 4. \*  $P < 0.05$ , \*\* $P < 0.01$ , \*\*\* $P < 0.001$ .

**Figure S2**

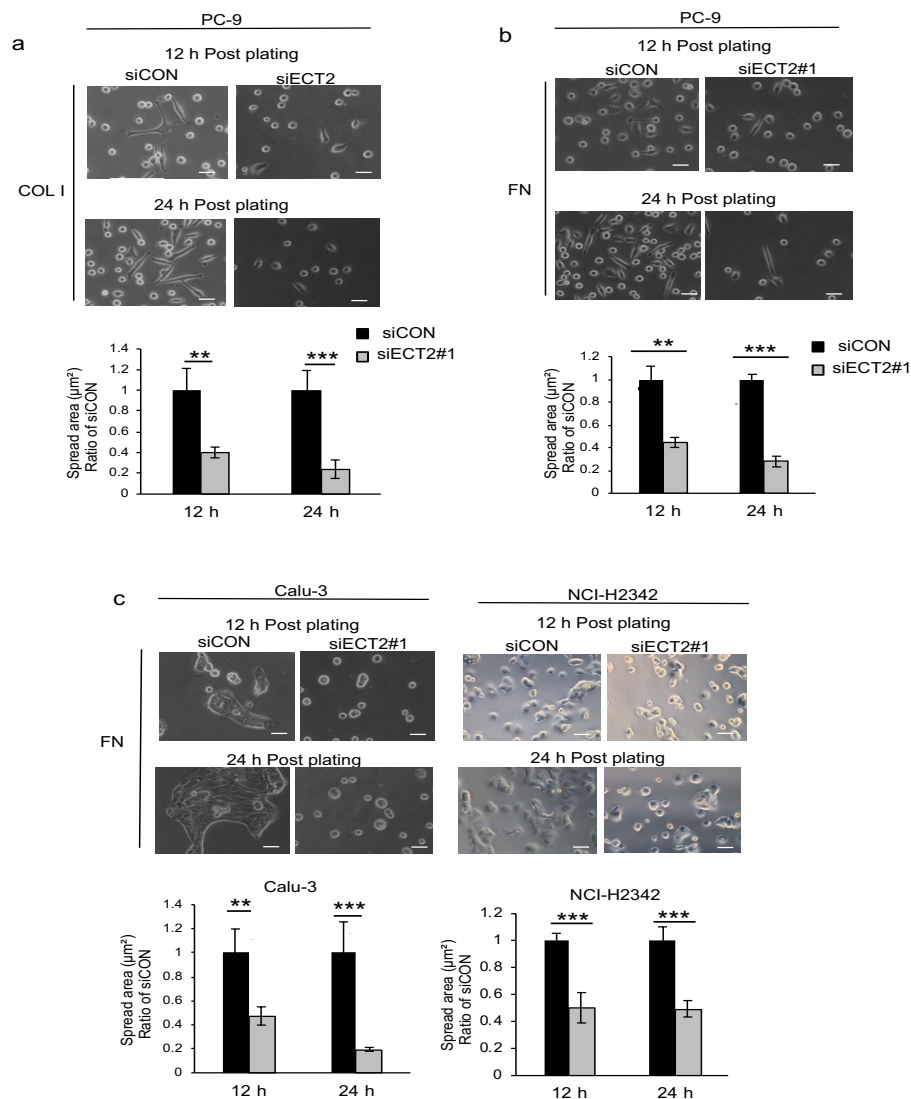

**Figure S2. Suppression of ECT2 inhibits the spreading of LAC cells.**

PC-9 cells transfected with siECT2#1 or siCON were spread on COL I- (a) and FN (b) -coated plates for 12 h and 24 h. The area of spread of siECT2#1- and siCON-transfected cells was analyzed and quantified using ImageJ software. Error bars represent mean $\pm$ SD, n = 4. (c) Calu-3 and NCI-H2342 cells transfected with siECT2#1 or siCON were spread on FN-coated plates for 12 h and 24 h. Phase-contrast micrographs show that cells transfected with siECT2#1 exhibit delayed or absent spreading relative to control cells. The area of spread of siECT2#1- and siCON-transfected cells was analyzed and quantified using ImageJ software. Error bars represent mean $\pm$ SD, n = 4, scale bar 100  $\mu$ m. \*\* $P$  <0.01, \*\*\* $P$  <0.001.

**Figure S3**

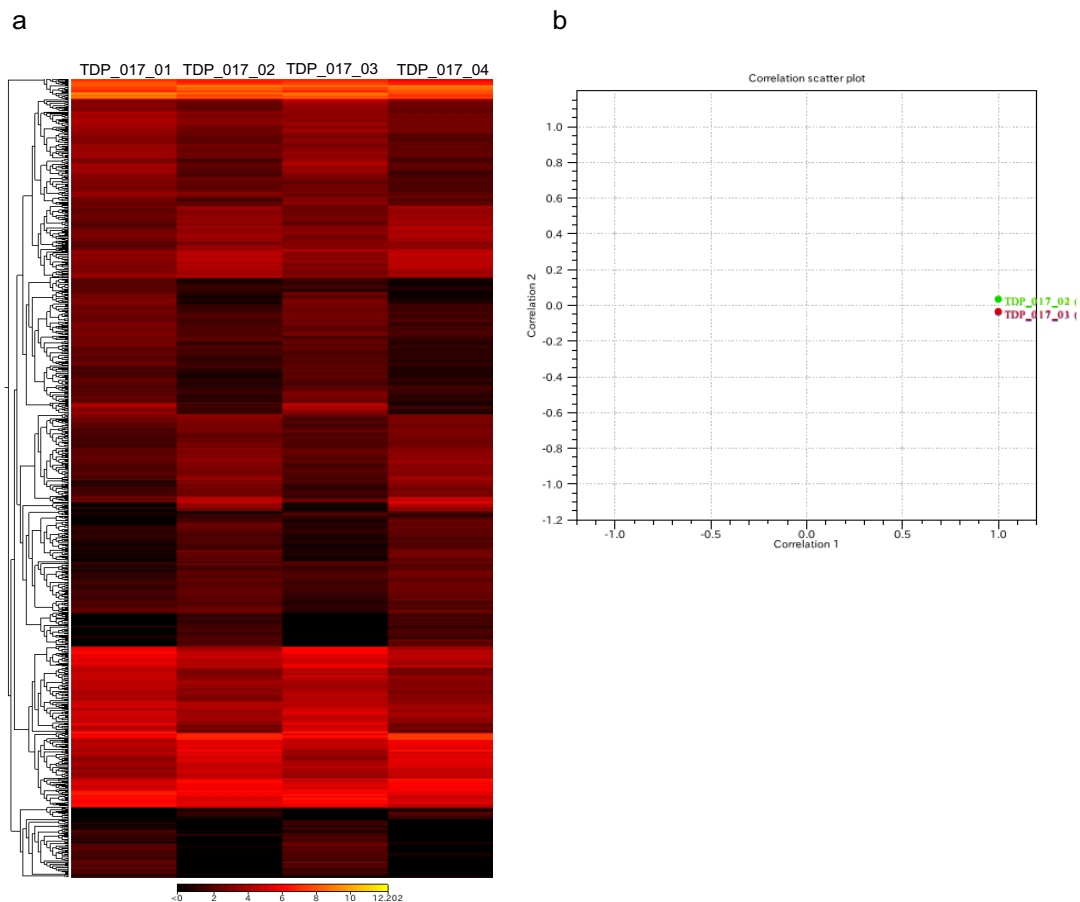

**Figure S3. RNA-seq profiling of ECT2 silencing in Calu-3 cells.**

Calu-3 cells were seeded on COL I-coated dishes and transfected with siECT2#1 or siCON for 48 h and 72 h. (a) Clustered heatmap shows a total of 2913 differentially expressed genes (GE) (absolute fold change and a difference of >2 fold) in Calu-3 cells at 48 h and 72 h. Data represent one sample per condition. (b) Correlation scatter plot of differentially expressed genes in Calu-3 cells transfected with siECT2#1 and siCON at 48 h and 72 h. The scatter plot indicates that similar expression patterns were observed among the differentially expressed genes in TDP\_017\_01 (GE) (Red) and TDP\_017\_03 (GE) (Blue), and TDP\_017\_02 (GE) (Green) and TDP\_017\_04 (GE) (Yellow). Abbreviations: TDP\_017\_01 (GE) (Red) represents siCON at 48 h, TDP\_017\_02 (GE) (Green) for siECT2#1 at 48 h, TDP\_017\_03 (GE) (Blue) for siCON at 72 h, and TDP\_017\_04 (GE) (Yellow) for siECT2#1 at 72 h.



**Figure S4**

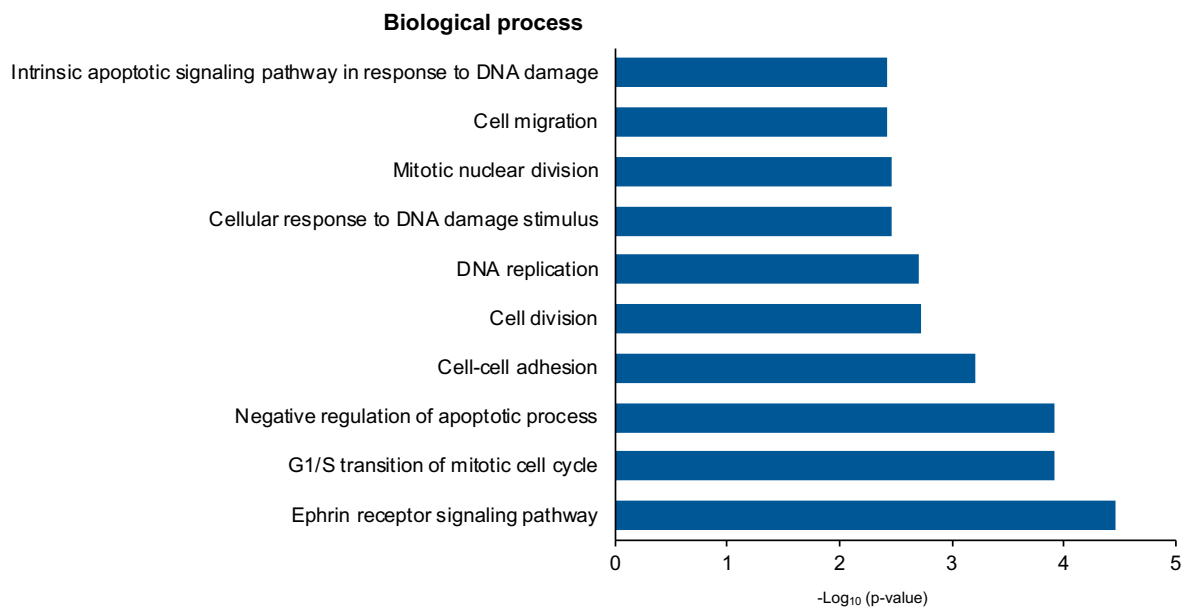

**Figure S4. Functional analysis of GO biological process terms for common genes.**

Data representing the top 10 significantly enriched GO terms for biological processes were defined as  $P < 0.05$  and more than 5 genes.

**Figure S5**

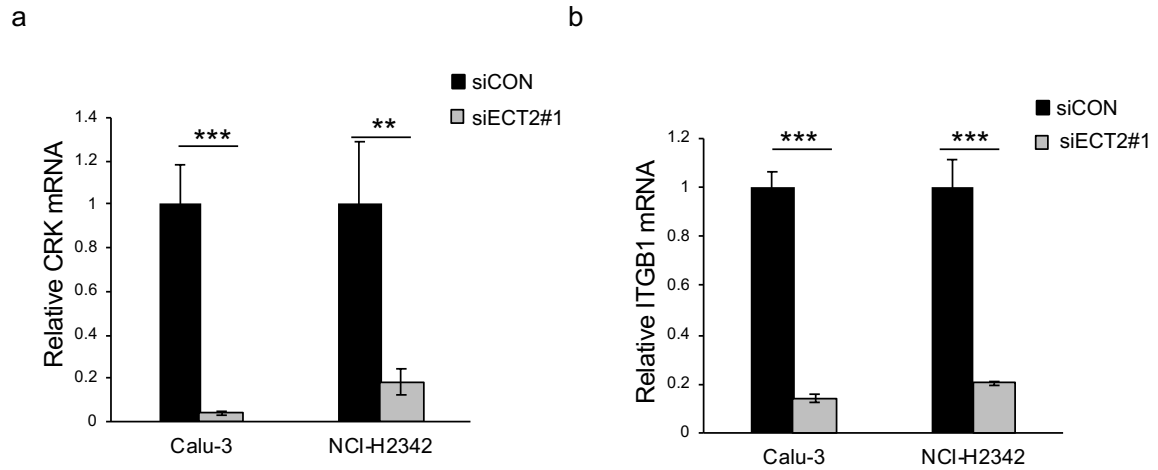

**Figure S5. Confirmation of RNA-seq results for selected representative genes.**

CRK (a) and ITGB1 (b) mRNA levels were determined by individual RT-PCR reactions. mRNA expression levels were assessed for both siECT2 and siCON in Calu-3 and NCI-H2342 cells. Error bars represent mean $\pm$ SD, n = 4, \*\* $P$  < 0.01, \*\*\* $P$  < 0.001.

**Figure S6**

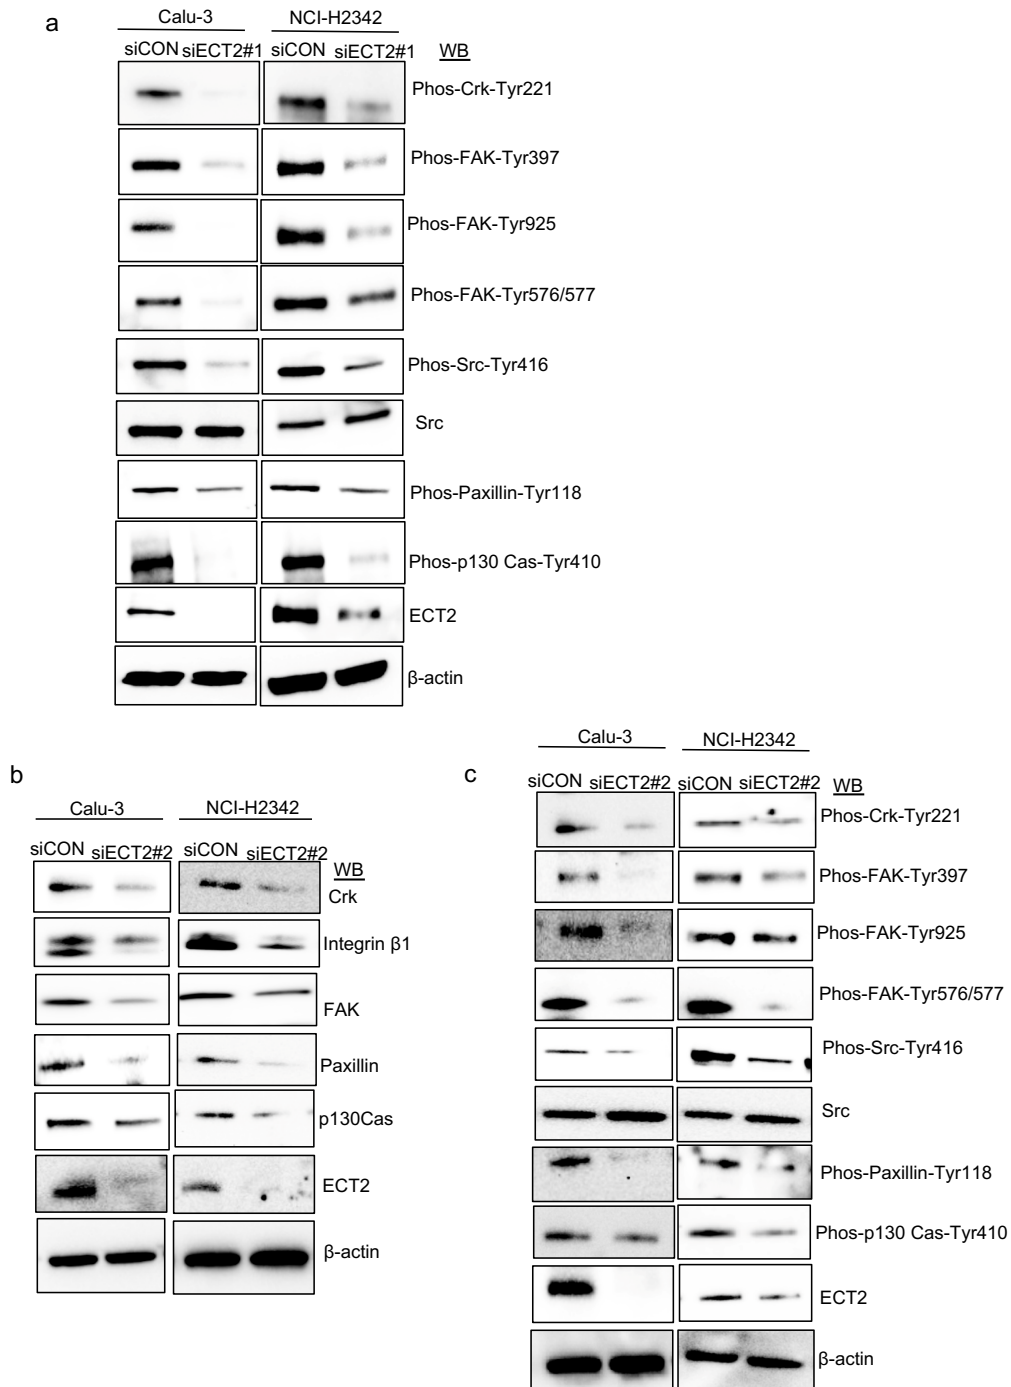

**Figure S6. Effect of ECT2 knockdown on proteins involved in focal adhesion signaling.**

Expression of total and phosphorylated focal adhesion signaling for proteins such as Crk, FAK, integrin  $\beta$ 1, and p130Cas and their downstream factors, including Src and paxillin, was assessed by Western blotting using Calu-3 and NCI-H2342 cells transfected with siECT2#1 (a) and siECT2#2 (b, c).

**Figure S7**

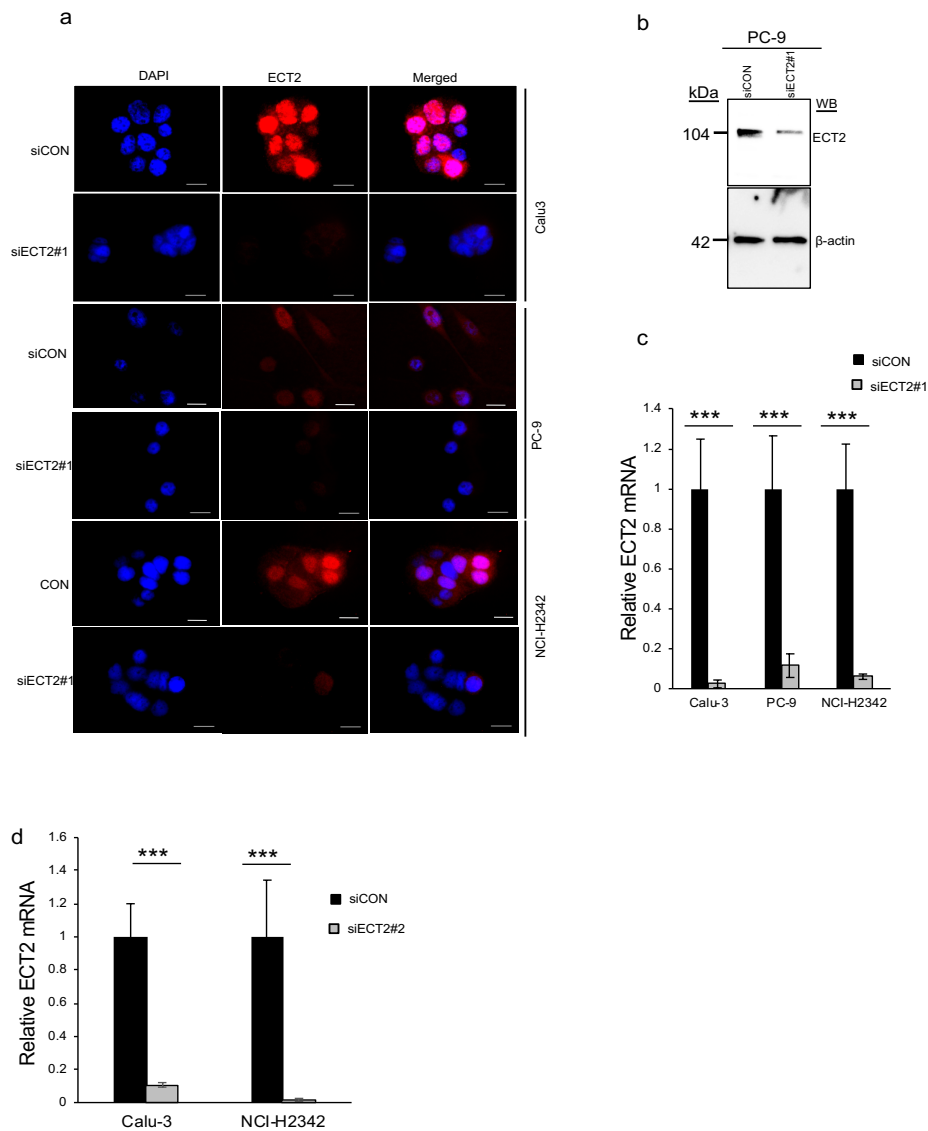

**Figure S7. Validation of ECT2 silencing efficiency.** (a) Representative images of Calu-3, PC-9, and NCI-H2342 cells transfected with siECT2#1 or siCON. The cells were fixed and reacted with an anti-ECT2 antibody. Nuclear DNA was counterstained with DAPI. Images were acquired using fluorescence microscopy. x1000 magnification, scale bar 10  $\mu$ m. (b) Equal amounts of whole-cell lysate from PC-9 cells were transfected with siECT2#1 for 24 h. Western blots show effective ECT2 suppression by siECT2#1 in PC-9 cells. RT-PCR was used to validate the suppression of ECT2#1 (c) and ECT2#2 (d) at the mRNA level. Error bars represent mean $\pm$ SD, n=4, \*\*\* $P < 0.001$ .

**Figure S8**

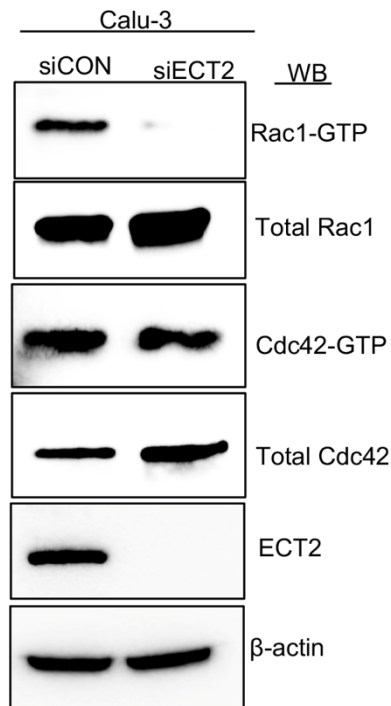

**Figure S8. Effect of ECT2 suppression on Rho GTPases in LAC cells.**

Total or active Rac1 (Rac1-GTP) and active Cdc42 (Cdc42-GTP) were examined using lysates from Calu-3 cells transfected with siECT2#1 or siCON for 72 h on COL I-coated dishes.
